# Supplementary material
Source: MDPI journal article supplement (https://www.mdpi.com/2227-9717/12/1/230)
Supplement: s1 [file s1]

## In Silico and In Vitro Analyses of Multiple Terpenes Predict Cryptotanshinone as a Potent Inhibitor of the Omicron Variant of SARS-CoV-2

Asmita Shrestha <sup>1</sup>, Siddha Raj Upadhyaya <sup>1</sup>, Bimal K. Raut <sup>1</sup>, Salyan Bhattacharai <sup>2</sup>, Khaga Raj Sharma <sup>1</sup>, Niranjana Parajuli <sup>1,3,\*</sup>, Jae Kyung Sohng <sup>3,\*</sup> and Bishnu P. Regmi <sup>4,\*</sup>

<sup>1</sup> Central Department of Chemistry, Tribhuvan University, Kirtipur, Kathmandu 44618, Nepal; sanzillshrestha@gmail.com (A.S.); upadhyayasiddharaj@gmail.com (S.R.U.); rautbimal777@gmail.com (B.K.R.); khaga.sharma@cdc.tu.edu.np (K.R.S.)

<sup>2</sup> Paraza Pharma, Inc., 2525 Avenue Marie-Curie, Montreal, QC H4S 2E1, Canada; salyanbiotech@gmail.com

<sup>3</sup> Institute of Biomolecule Reconstruction (iBR), Department of Life Science and Biochemical Engineering, Sun Moon University, Asan 31460, Republic of Korea

<sup>4</sup> Department of Chemistry, Florida Agricultural and Mechanical University, Tallahassee, FL 32307, USA

\* Correspondence: authors: niranjana.parajuli@cdc.tu.edu.np (N.P.); sohng@sunmoon.ac.kr (J.K.S.); bishnu.regmi@famu.edu (B.P.R.)

**Table S1** Terpenes with antiviral activities

| Source                                              | Class of compounds             | Compounds                                    | IC <sub>50</sub> /EC <sub>50</sub>                                | Target site/virus                            | References |
|-----------------------------------------------------|--------------------------------|----------------------------------------------|-------------------------------------------------------------------|----------------------------------------------|------------|
| <i>Stachybotrys nephrospra</i> BCC3900              | Spirodihydrobenzofuran terpene | Stachybotrydial (Mer-NF5003F) (1)            | 4.32 µg/ml                                                        | HSV-1                                        | [68]       |
| <i>Stachybotrys</i> species                         | Sesquiterpene derivative       | Stachyflin (2)                               | 0.003 µM<br>0.2–0.6 µM                                            | A/WSN/33 virus<br>H1 or H2 subtype influenza | [69]       |
| <i>Juniperus oxycedrus</i> L. ssp. <i>oxycedrus</i> | monoterpenes                   | α-Pinene(3)<br>β-myrcene(4)                  | 270µg/ml<br>200µg/ml                                              | SARS-CoV<br>HSV-1                            | [70]       |
| <i>Citrus reshni</i>                                | monoterpene                    | Limonene (5)                                 | 5.9 µg/ml                                                         | HSV-1                                        | [71]       |
| <i>Lycopus europaeus</i>                            | Diterpenoid                    | Abietane(6)                                  | 1.39µM<br>(3CL <sup>pro</sup> )                                   | SARS-CoV                                     | [72]       |
| <i>Perovskia atriplicifolia</i>                     | terpenoids                     | Norperovskatone (7)<br><br>Biperovskatone(8) | 0.11 mM(HBsAg)/0.18mM (HBeAg)<br><br>0.33mM(HBsAg)/0.12mM (HBeAg) | Hepatitis B Virus                            | [72]       |

[illegible]

|                                          |                                     |                                                                                              |                                                                                                |          |      |
|------------------------------------------|-------------------------------------|----------------------------------------------------------------------------------------------|------------------------------------------------------------------------------------------------|----------|------|
| <i>Juniperus formosana</i>               | Sesquiterpenoids<br><br>Diterpenoid | Cedrane-3 $\beta$ ,1,2-diol(27)<br><br>3 $\beta$ ,12-diacetoxylabieta-6,8,11,13-tetraene(28) | >10 $\mu$ M<br><br>1.57Mm                                                                      | SARS-CoV | [72] |
| <i>Salvia miltiorrhiza</i>               | Tanshinones (abietane diterpene )   | Tanshinone IIA(29)                                                                           | 89.1 $\pm$ 5.2 $\mu$ M (3CL <sup>pro</sup> )<br><br>1.6 $\pm$ 0.5 $\mu$ M(PL <sup>pro</sup> )  | SARSCoV- | [75] |
|                                          |                                     | Methyl tanshinonate (30)                                                                     | 21.1 $\pm$ 0.8 $\mu$ M(3CL <sup>pro</sup> )<br><br>9.2 $\pm$ 2.8 $\mu$ M(PL <sup>pro</sup> )   |          |      |
|                                          |                                     | Tanshinone IIB(31)                                                                           | 24.8 $\pm$ 0.8 $\mu$ M (3CL <sup>pro</sup> )<br><br>10.7 $\pm$ 1.7 $\mu$ M(PL <sup>pro</sup> ) |          |      |
|                                          |                                     | Cryptotanshinone(32)                                                                         | 226.7 $\pm$ 6.2 $\mu$ M (3CL <sup>pro</sup> )<br><br>0.8 $\pm$ 0.2 $\mu$ M(PL <sup>pro</sup> ) |          |      |
|                                          |                                     | Rosmariquinone(33)                                                                           | 21.1 $\pm$ 0.8 $\mu$ M (3CL <sup>pro</sup> )<br><br>30.0 $\pm$ 5.5 $\mu$ M(PL <sup>pro</sup> ) |          |      |
| <i>Thymus vulgaris</i> (essential oil)   | monoterpenes                        | p-Cymene(34)                                                                                 | 16 $\mu$ g/ml                                                                                  | HSV-1    | [76] |
| <i>Syzygium nervosum</i> (Essential oil) | monoterpenes                        | $\alpha$ -Terpinene(35)<br><br>$\gamma$ -Terpinene(36)                                       | 8.5 $\mu$ g/ml<br><br>7 $\mu$ g/ml                                                             | HSV-1    | [76] |
|                                          | monoterpenoids                      | $\alpha$ -Terpineol(37)                                                                      | 22 $\mu$ g/ml                                                                                  | HSV-1    | [76] |

|                                   |                             |                                                                     |                                                                  |                                |      |
|-----------------------------------|-----------------------------|---------------------------------------------------------------------|------------------------------------------------------------------|--------------------------------|------|
| <i>Bupleurum falcatum</i> L       | terpenoid                   | Saikosaponin A(38)<br>Saikosaponin B2 (39)<br>Saikosaponin D (40)   | 8.6 ± 0.3<br>μmol/L<br>1.7 ± 0.1<br>μmol/L<br>13.2±0.3<br>μmol/L | HCoV-229E                      | [77] |
| <i>Triterygium regelii</i>        | Quinone-methide triterpenes | Celastrol(41)<br>Pristimerin(42)<br>Tingenone(43)<br>Iguesterin(44) | 0.3 μM<br>5.5 μM<br>9.9 μM<br>2.6 μM                             | SARS-CoV (3CL <sup>pro</sup> ) | [78] |
| <i>Eucalyptus globulus</i> Labill | Triterpenes                 | Tereticornate A (45)                                                | 0.96 μg/mL                                                       | HSV-1                          | [79] |
| <i>Brucea javanica</i>            |                             | β-Caryophyllene (46)                                                | 8 ± 3.4 μM<br>11 ± 4.9 μM                                        | HSV-1<br>DENV                  | [80] |
| <i>Juniperus formosana</i>        | Triterpenoids               | Betulonic acid(47)                                                  | 0.63 μM                                                          | SARS-CoV                       | [72] |
| <i>Betula pubescens</i>           | Pentacyclic triterpenoid    | Betulonic acid(48)                                                  | 10μM(3CL <sup>pro</sup> )                                        | SARS-CoV                       | [72] |
| <i>Glycyrrhiza uralensis</i>      | triterpene glycoside        | Glycyrrhizin(49)                                                    | 365 μM                                                           | SARS-CoV                       | [81] |
| <i>Ganoderma pfeifferi</i>        | triterpenes                 | Lucialdehyde B (50)                                                 | 0.075μg/ml                                                       | HSV                            | [82] |

**Table S2** PubChem ID and binding affinity of terpenes with S1-RBD of SARS CoV-2 Omicron variant.

| S.N | Compounds       | PubChem ID | Binding Affinities (kcal/mol) |
|-----|-----------------|------------|-------------------------------|
| 1.  | Stachybotrydial | 3035835    | -7.2                          |
| 2   | Stachyflin      | 493326     | -8.0                          |

|    |                                                  |           |      |
|----|--------------------------------------------------|-----------|------|
| 3  | $\alpha$ -Pinene                                 | 6654      | -5.4 |
| 4  | $\beta$ -myrcene                                 | 31253     | -5.4 |
| 5  | limonene                                         | 22311     | -5.6 |
| 6  | Abietane                                         | 6857485   | -7.3 |
| 7  | Norperovskatone                                  | -         | -6.8 |
| 8  | Biperovskatone                                   | -         | -8.8 |
| 9  | 7- $\beta$ -hydroxydeoxycryptojaponol            | 14827260  | -7.1 |
| 10 | cryptojaponol                                    | 11724205  | -6.8 |
| 11 | Ferruginol                                       | 442027    | -7.2 |
| 12 | Pinusolidic acid                                 | 25880646  | -7.3 |
| 13 | Dehydroabieta-7-one                              |           | -7.5 |
| 14 | $\alpha$ -cadinol                                | 6431302   | -8.7 |
| 15 | 6,7-dehydroroleanone                             | 2751794   | -7.3 |
| 16 | Jiadifenoic acid J                               | 102369038 | -7.1 |
| 17 | Jiadifenoic acid K                               | 102369039 | -7.8 |
| 18 | Jiadifenoic acid L                               | 102369040 | -7.4 |
| 19 | Jiadifenoic acid M                               | -         | -7.3 |
| 20 | Jiadifenoic acid N                               | 90468202  | -7.3 |
| 21 | Jiadifenoic acid O                               | 102369041 | -7.1 |
| 22 | Jiadifenoic acid P                               | 90468203  | -7.1 |
| 23 | Sesquicaranoic acid A                            | 102369042 | -6.7 |
| 24 | Sesquicaranoic acid B                            | 102369043 | -6.5 |
| 25 | Majusanic acid E                                 | 72705062  | -7.2 |
| 26 | Majusanic acid F                                 | 72705063  | -7.3 |
| 27 | Cedrane-3 $\beta$ ,1,2-diol                      | 44427462  | -6.7 |
| 28 | 3 $\beta$ ,12-diacetoxyabieta-6,8,11,13-tetraene | -         | -7.4 |

|    |                     |           |      |
|----|---------------------|-----------|------|
| 29 | Tanshinone IIA      | 164676    | -7.6 |
| 30 | Methyl tanshinonate | 14610613  | -6.8 |
| 31 | Tanshinone IIB      | 9926694   | -7.4 |
| 32 | Cryptotanshinone    | 160254    | -7.6 |
| 33 | Rosmariquinone      | 160142    | -7.2 |
| 34 | p-Cymene            | 7463      | -5.6 |
| 35 | $\alpha$ -Terpinene | 7462      | -5.6 |
| 36 | $\gamma$ -Terpinene | 7461      | -5.5 |
| 37 | $\alpha$ -Terpineol | 17100     | -5.3 |
| 38 | Saikosaponin A      | 167928    | -8.7 |
| 39 | Saikosaponin B2     | 21637642  | -9.3 |
| 40 | Saikosaponin D      | 107793    | -9.1 |
| 41 | Celastrol           | 122724    | -7.5 |
| 42 | Pristimerin         | 159516    | -7.3 |
| 43 | Tingenone           | 101520    | -8.1 |
| 44 | Iguesterin          | 46881919  | -7.7 |
| 45 | Tereticornate A     | 129316505 | -9.2 |
| 46 | Beta-caryophyllene  | 20831623  | -5.9 |
| 47 | Betulonic acid      | 122844    | -7.4 |
| 48 | Betulinic acid      | 64971     | -7.2 |
| 49 | Glycyrrhizin        | 14982     | -9.1 |
| 50 | Lucialdehyde B      | 10343868  | -7.3 |

**Table S3** Drug-like properties of cryptotanshinone and luteolin.

| S.N. | Compounds        | TPSA ( $\text{\AA}^2$ ) | Log P | Lipinski Rule of Five |
|------|------------------|-------------------------|-------|-----------------------|
| 1    | Cryptotanshinone | 43.37                   | 3.43  | Yes; 0 violation      |
| 2    | Luteolin         | 111.13                  | 1.86  | Yes; 0 violation      |

**Table S4** ADMET profiles of cryptotanshinone and luteolin.

| S. N. | Compounds        | Water Solubility (log mol/litre) | Caco-2 Permeability (log Papp $10^{-6}$ cm/s) | Intestinal absorption (%absorbed) | BBB Permeation (log BB) | CYP Inhibition                | Total Clearance (log ml/min/kg) | Ames Toxicity | Hepatotoxicity | Toxicity class |
|-------|------------------|----------------------------------|-----------------------------------------------|-----------------------------------|-------------------------|-------------------------------|---------------------------------|---------------|----------------|----------------|
| 1     | Cryptotanshinone | -3.79 (moderately soluble)       | 1.327                                         | 97.189                            | 0.284                   | Yes (CYP1A2, CYP2C19, CYP3A4) | 0.845                           | No            | No             | VI             |
| 2     | Luteolin         | -3.71 (soluble)                  | 0.096                                         | 81.13                             | -0.907                  | Yes (CYP1A2, CYP2C9)          | 0.495                           | No            | No             | V              |

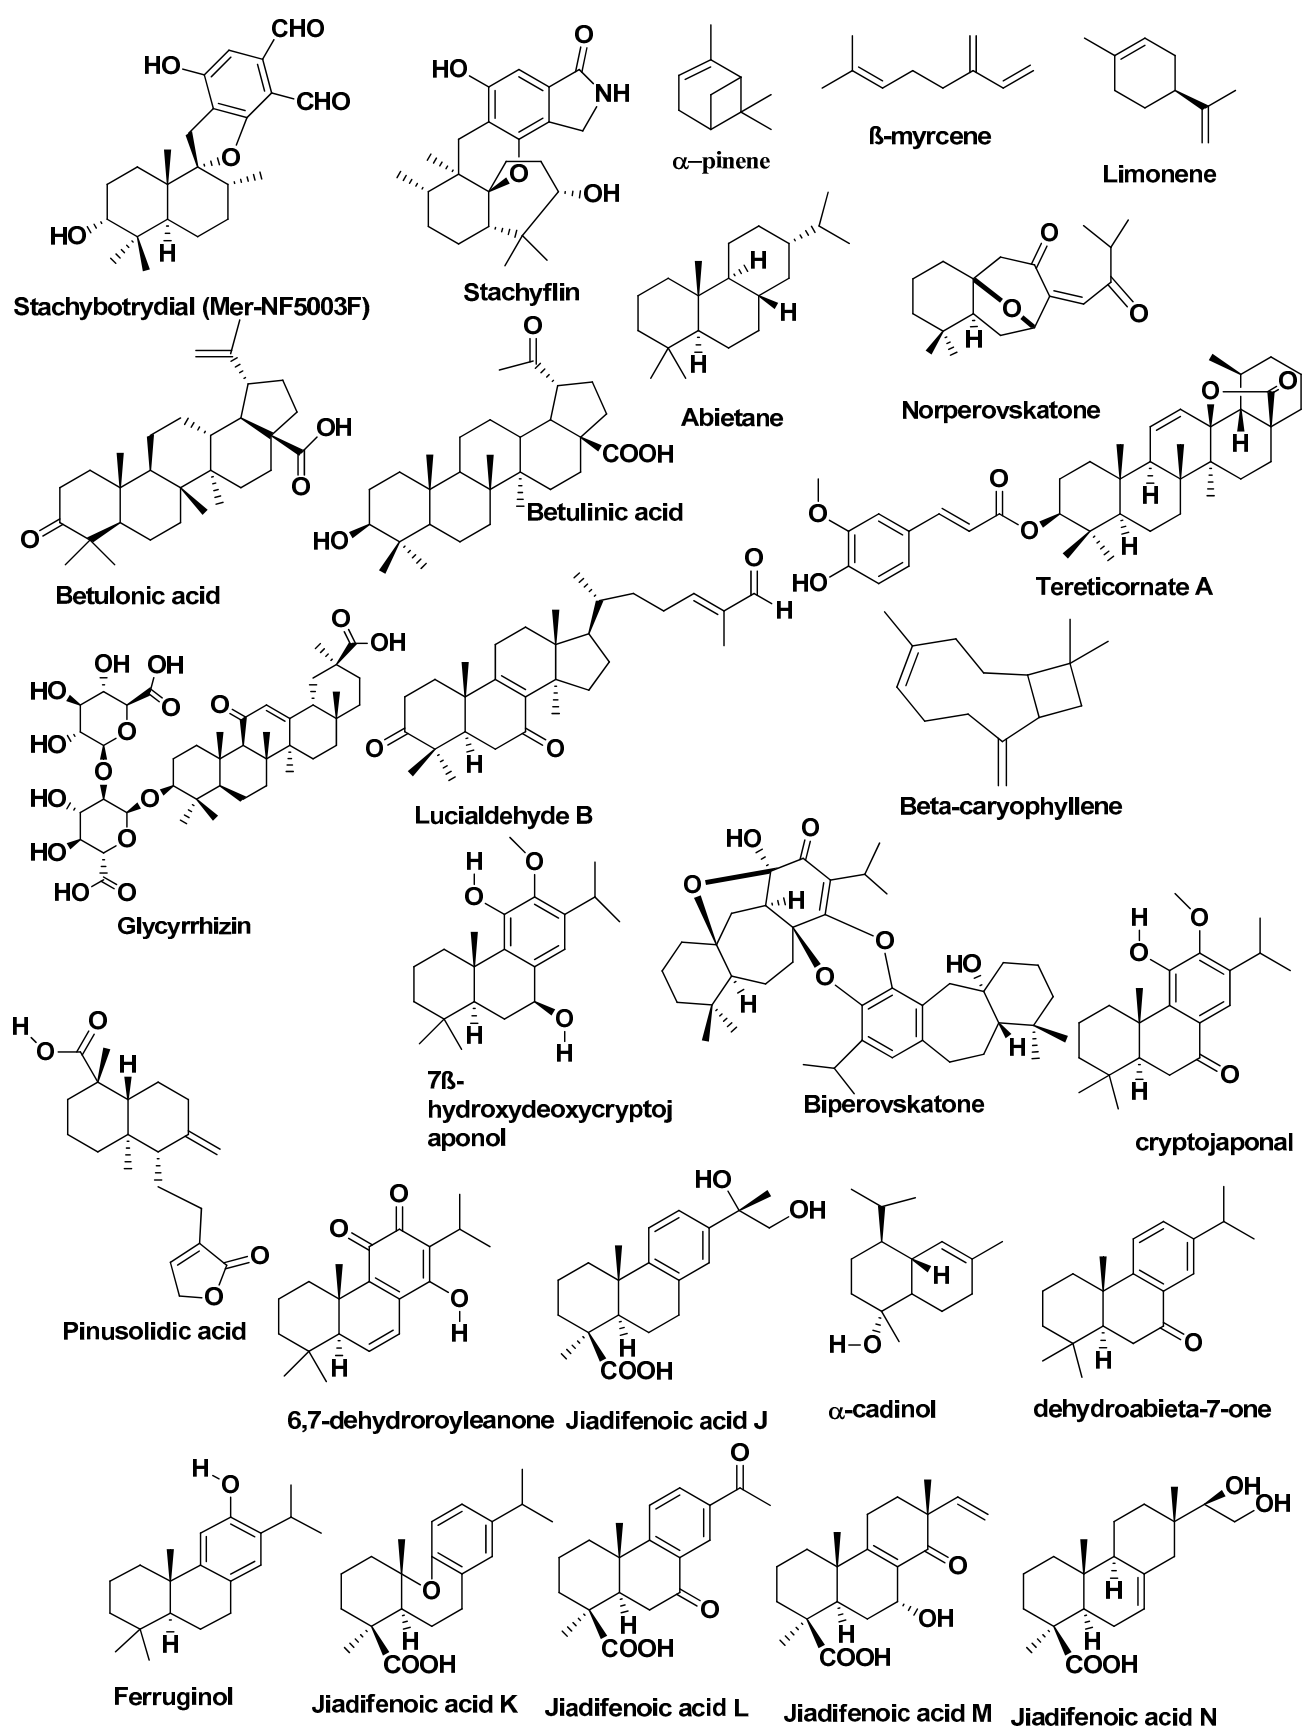



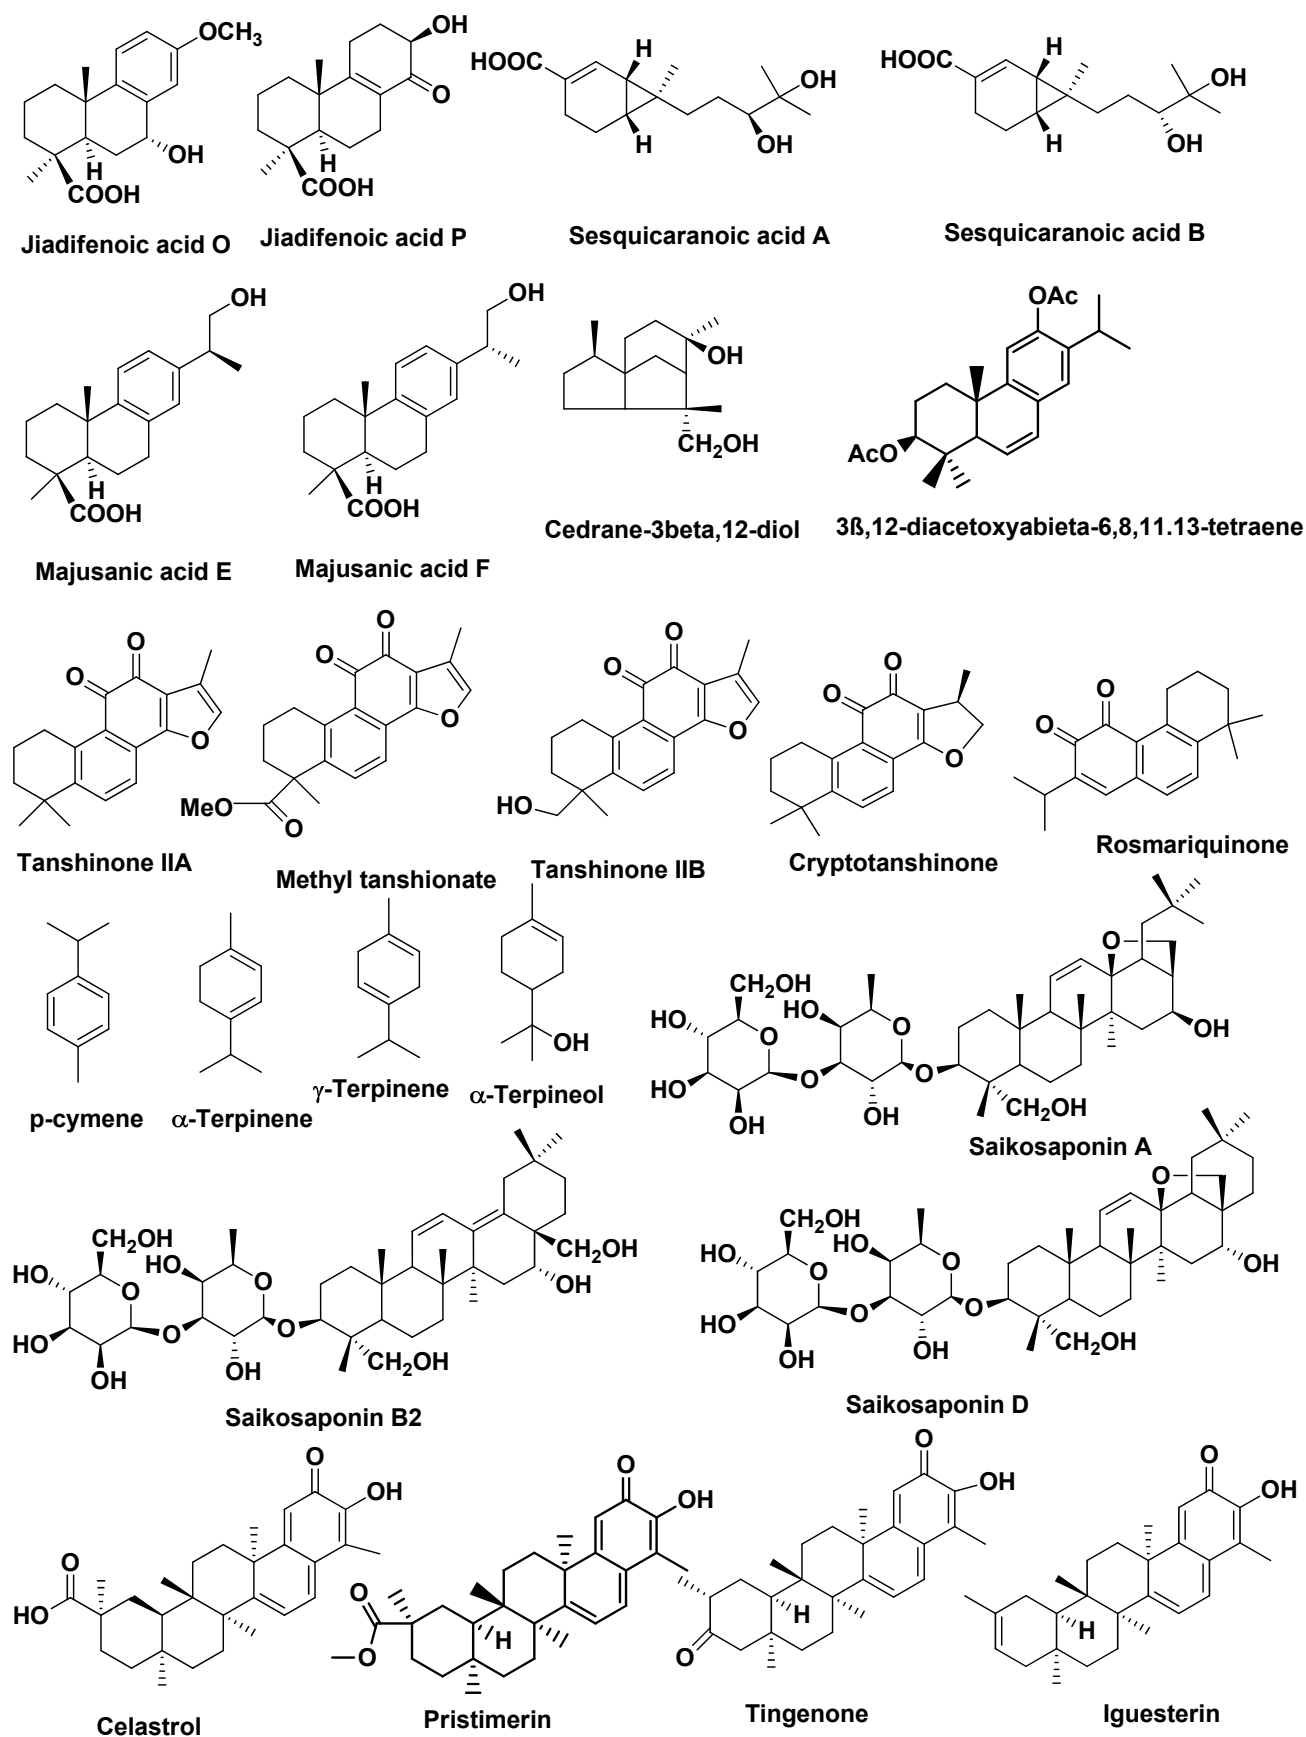

Figure S1: Structures of selected terpenes.

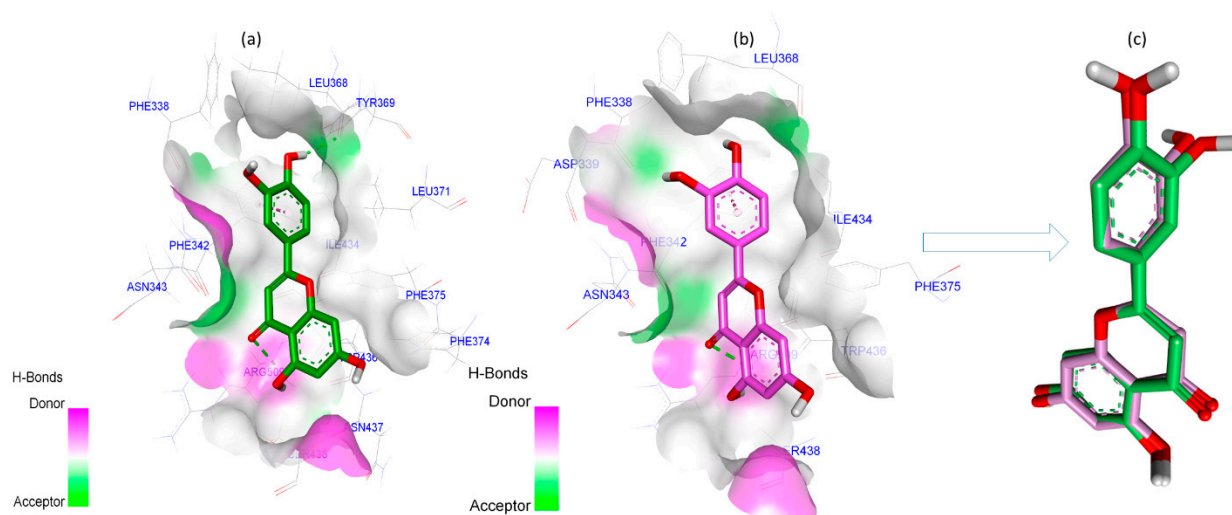

**Figure S2:** Validation of docking protocol. (a) First docked luteolin (green) (b) second docked luteolin (magenta) and (c) superimposition of two docked luteolin (RMSD = 0.621 Å)

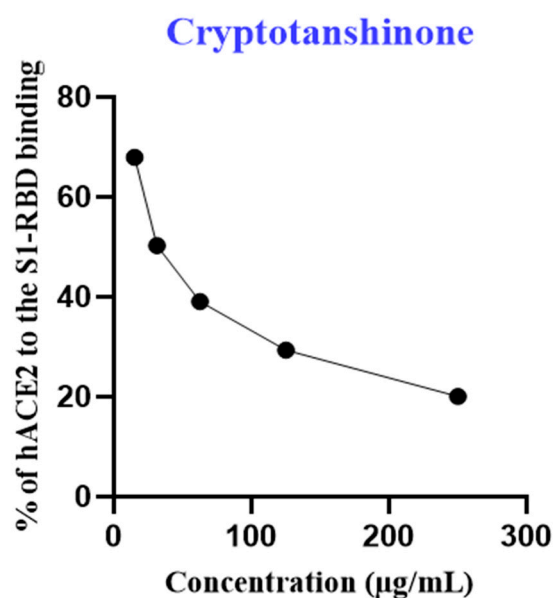

**Figure S3:** Binding curve of hACE2 receptor to S1-RBD of SARS-CoV-2 Omicron variant in the presence of different concentration of cryptotanshinone as determined by ELISA.

## References

68. Sawadjoon, S.; Kittakoop, P.; Isaka, M.; Kirtikara, K.; Madla, S.; Thebtaranonth, Y. Antiviral and Antiplasmodial Spirodihydrobenzofuran Terpenes from the Fungus *Stachybotrys nephrospora*. *Planta Med* **2004**, *70*, 1085–1087, doi:10.1055/s-2004-832652.
69. Yoshimoto, J.; Kakui, M.; Iwasaki, H.; Fujiwara, T.; Sugimoto, H.; Hattori, N. Identification of a Novel HA Conformational Change Inhibitor of Human Influenza Virus. *Arch. Virol.* **1999**, *144*, 865–878, doi:10.1007/s007050050552.
70. Phytochemical Analysis and in Vitro Antiviral Activities of the Essential Oils of Seven Lebanon Species - Loizzo - 2008 - Chemistry & Biodiversity - Wiley Online Library Available online: <https://onlinelibrary.wiley.com/doi/10.1002/cbdv.200890045> (accessed on 15 January 2024).

71. Nagoor Meeran, M.F.; Seenipandi, A.; Javed, H.; Sharma, C.; Hashiesh, H.M.; Goyal, S.N.; Jha, N.K.; Ojha, S. Can Limonene Be a Possible Candidate for Evaluation as an Agent or Adjuvant against Infection, Immunity, and Inflammation in COVID-19? *Heliyon* **2021**, *7*, e05703, doi:10.1016/j.heliyon.2020.e05703.
72. Wen, C.-C.; Kuo, Y.-H.; Jan, J.-T.; Liang, P.-H.; Wang, S.-Y.; Liu, H.-G.; Lee, C.-K.; Chang, S.-T.; Kuo, C.-J.; Lee, S.-S.; et al. Specific Plant Terpenoids and Lignoids Possess Potent Antiviral Activities against Severe Acute Respiratory Syndrome Coronavirus. *J. Med. Chem.* **2007**, *50*, 4087–4095, doi:10.1021/jm070295s.
73. Zhang, G.-J.; Li, Y.-H.; Jiang, J.-D.; Yu, S.-S.; Wang, X.-J.; Zhuang, P.-Y.; Zhang, Y.; Qu, J.; Ma, S.-G.; Li, Y.; et al. Diterpenes and Sesquiterpenes with Anti-Coxsackie Virus B3 Activity from the Stems of Illicium Jiadifengpi. *Tetrahedron* **2014**, *70*, 4494–4499, doi:10.1016/j.tet.2014.05.006.
74. Wang, Y.-D.; Zhang, G.-J.; Qu, J.; Li, Y.-H.; Jiang, J.-D.; Liu, Y.-B.; Ma, S.-G.; Li, Y.; Lv, H.-N.; Yu, S.-S. Diterpenoids and Sesquiterpenoids from the Roots of Illicium Majus. *J. Nat. Prod.* **2013**, *76*, 1976–1983, doi:10.1021/np400638r.
75. Park, J.-Y.; Kim, J.H.; Kim, Y.M.; Jeong, H.J.; Kim, D.W.; Park, K.H.; Kwon, H.-J.; Park, S.-J.; Lee, W.S.; Ryu, Y.B. Tanshinones as Selective and Slow-Binding Inhibitors for SARS-CoV Cysteine Proteases. *Bioorganic & Medicinal Chemistry* **2012**, *20*, 5928–5935, doi:10.1016/j.bmc.2012.07.038.
76. Astani, A.; Reichling, J.; Schnitzler, P. Comparative Study on the Antiviral Activity of Selected Monoterpenes Derived from Essential Oils. *Phytotherapy Research* **2010**, *24*, 673–679, doi:10.1002/ptr.2955.
77. Cheng, P.-W.; Ng, L.-T.; Chiang, L.-C.; Lin, C.-C. Antiviral Effects of Saikosaponins on Human Coronavirus 229e in Vitro. *Clinical and Experimental Pharmacology and Physiology* **2006**, *33*, 612–616, doi:https://doi.org/10.1111/j.1440-1681.2006.04415.x.
78. Ryu, Y.B.; Park, S.-J.; Kim, Y.M.; Lee, J.-Y.; Seo, W.D.; Chang, J.S.; Park, K.H.; Rho, M.-C.; Lee, W.S. SARS-CoV 3CLpro Inhibitory Effects of Quinone-Methide Triterpenes from Tripterygium Regelii. *Bioorganic & Medicinal Chemistry Letters* **2010**, *20*, 1873–1876, doi:10.1016/j.bmcl.2010.01.152.
79. Viruses | Free Full-Text | Anti-Infectivity against Herpes Simplex Virus and Selected Microbes and Anti-Inflammatory Activities of Compounds Isolated from Eucalyptus Globulus Labill. Available online: <https://www.mdpi.com/1999-4915/10/7/360> (accessed on 15 January 2024).
80. Evaluation of in Vitro Antiviral Activity of Essential Oil Compounds Against Dengue Virus | Pharmacognosy Journal Available online: <https://phcogj.com/article/470> (accessed on 15 January 2024).
81. Hoefer, G.; Baltina, L.; Michaelis, M.; Kondratenko, R.; Baltina, L.; Tolstikov, G.A.; Doerr, H.W.; Cinatl, J. Antiviral Activity of Glycyrrhizic Acid Derivatives against SARS–Coronavirus. *J. Med. Chem.* **2005**, *48*, 1256–1259, doi:10.1021/jm0493008.
82. Niedermeyer, T.H.J.; Lindequist, U.; Mentel, R.; Gordes, D.; Schmidt, E.; Thurow, K.; Lalk, M. Antiviral Terpenoid Constituents of Ganoderma Pfeifferi. *J. Nat. Prod.* **2005**, *68*, 1728–1731, doi:10.1021/np0501886.
